# Supplementary material for: Develop an ADR prediction system of Chinese herbal injections containing Panax notoginseng saponin: a nested case–control study using machine learning
Source: HighWire-hosted journal article supplement (doi:10.1136/bmjopen-2022-061457), 2022-09-01
Supplement: bmjopen-2022-061457supp001_data_supplement.pdf [file bmjopen-2022-061457supp001_data_supplement.pdf]

**Table 1** Demographic and clinical characteristics of the patients

| Parameter                                 | Number     |
|-------------------------------------------|------------|
| Gender                                    |            |
| Male                                      | 250(47.17) |
| Female                                    | 280(52.83) |
| Age (years)                               |            |
| ≤ 44                                      | 121(22.83) |
| 45 ≤ Age ≤ 59                             | 193(36.42) |
| 60 ≤ Age ≤ 74                             | 132(24.91) |
| ≥ 75                                      | 84 (15.85) |
| Body mass index (BMI, kg/m <sup>2</sup> ) |            |
| < 18.5                                    | 48(9.06)   |
| 18.5 ≤ BMI ≤ 23.9                         | 275(51.89) |
| ≥ 24                                      | 175(33.02) |
| Charlson comorbidity index (Score)        |            |
| 0                                         | 104(19.62) |
| 1 or 2                                    | 190(35.85) |
| 3 or 4                                    | 123(23.21) |
| ≥ 5                                       | 113(21.32) |

Data presented as number (%)

**Table 2** Variable assignment

| Number | Variable                                  | Assignment                                                                                                                                                                                                                                                                                                                                                                                                                                                                                                    |
|--------|-------------------------------------------|---------------------------------------------------------------------------------------------------------------------------------------------------------------------------------------------------------------------------------------------------------------------------------------------------------------------------------------------------------------------------------------------------------------------------------------------------------------------------------------------------------------|
|        | Adverse drug reaction                     | 1, Yes; 0, No                                                                                                                                                                                                                                                                                                                                                                                                                                                                                                 |
| X1     | Gender                                    | 1, Male; 0, Female                                                                                                                                                                                                                                                                                                                                                                                                                                                                                            |
| X2     | Age (years)                               | 1, $\leq 44$ ; 2, $45 \leq \text{Age} \leq 59$ ; 3, $60 \leq \text{Age} \leq 74$ ; 4, $\geq 75$                                                                                                                                                                                                                                                                                                                                                                                                               |
| X3     | Body mass index (BMI, kg/m <sup>2</sup> ) | 1, $< 18.5$ ; 2, $18.5 \leq \text{BMI} \leq 23.9$ ; 3, $\geq 24$                                                                                                                                                                                                                                                                                                                                                                                                                                              |
| X4     | Asians                                    | 1, Yes; 0, No                                                                                                                                                                                                                                                                                                                                                                                                                                                                                                 |
| X5     | Genetic family history                    | 1, Yes; 0, No                                                                                                                                                                                                                                                                                                                                                                                                                                                                                                 |
| X6     | History of allergy                        | 1, Yes; 0, No                                                                                                                                                                                                                                                                                                                                                                                                                                                                                                 |
| X7     | Smoking                                   | 1, Yes; 0, No                                                                                                                                                                                                                                                                                                                                                                                                                                                                                                 |
| X8     | Alcohol                                   | 1, Yes; 0, No                                                                                                                                                                                                                                                                                                                                                                                                                                                                                                 |
| X9     | Temperature (°C)                          | 1, $< 36.1$ ; 2, $36.1 \leq \text{Temperature} \leq 37.2$ ; 3, $> 37.3$                                                                                                                                                                                                                                                                                                                                                                                                                                       |
| X10    | Pulse (beats/min)                         | 1, $< 60$ ; 2, $60 \leq \text{Pulse} \leq 100$ ; 3, $> 100$                                                                                                                                                                                                                                                                                                                                                                                                                                                   |
| X11    | Breathe (times/min)                       | 1, $< 12$ ; 2, $12 \leq \text{Breathe} \leq 20$ ; 3, $> 20$                                                                                                                                                                                                                                                                                                                                                                                                                                                   |
| X12    | Blood pressure                            | 0, Normal (systolic pressure $\leq 139$ mmHg or diastolic pressure $\leq 89$ mmHg); 1, Grade I ( $140 \text{ mmHg} \leq \text{systolic pressure} \leq 159 \text{ mmHg}$ or $90 \text{ mmHg} \leq \text{diastolic pressure} \leq 99 \text{ mmHg}$ ); 2, Grade II ( $160 \text{ mmHg} \leq \text{systolic pressure} \leq 179 \text{ mmHg}$ or $100 \text{ mmHg} \leq \text{diastolic pressure} \leq 109 \text{ mmHg}$ ); 3, Grade III (systolic pressure $\geq 180$ mmHg or diastolic pressure $\geq 110$ mmHg) |
| X13    | Charlson comorbidity index (Score)        | 1, 0; 2, 1 or 2; 3, 3 or 4; 4, $\geq 5$                                                                                                                                                                                                                                                                                                                                                                                                                                                                       |
| X14    | Cardiovascular disease                    | 1, Yes; 0, No                                                                                                                                                                                                                                                                                                                                                                                                                                                                                                 |

|     |                                |                                                                               |
|-----|--------------------------------|-------------------------------------------------------------------------------|
| X15 | Endocrine diseases             | 1, Yes; 0, No                                                                 |
| X16 | Respiratory diseases           | 1, Yes; 0, No                                                                 |
| X17 | Nervous diseases               | 1, Yes; 0, No                                                                 |
| X18 | Digestive diseases             | 1, Yes; 0, No                                                                 |
| X19 | Neoplastic diseases            | 1, Yes; 0, No                                                                 |
| X20 | Orthopedic diseases            | 1, Yes; 0, No                                                                 |
| X21 | Genito-urinary diseases        | 1, Yes; 0, No                                                                 |
| X22 | Hematopathy                    | 1, Yes; 0, No                                                                 |
| X23 | Oculopathy                     | 1, Yes; 0, No                                                                 |
| X24 | Ear-nose-throat diseases       | 1, Yes; 0, No                                                                 |
| X25 | Dermatoses                     | 1, Yes; 0, No                                                                 |
| X26 | Immune rheumatism              | 1, Yes; 0, No                                                                 |
| X27 | Other diseases                 | 1, Yes; 0, No                                                                 |
| X28 | Solvent                        | 1, 0.9% sodium chloride injection; 2, 5% glucose injection; 3, Other solvents |
| X29 | Dose (mg)                      | 1, < 1.6; 2, =1.6; 3, > 1.6                                                   |
| X30 | Anti-infective agents          | 1, Yes; 0, No                                                                 |
| X31 | Cardiovascular medicines       | 1, Yes; 0, No                                                                 |
| X32 | Medicines for digestive system | 1, Yes; 0, No                                                                 |
| X33 | Respiratory medicines          | 1, Yes; 0, No                                                                 |
| X34 | Nervous system medicines       | 1, Yes; 0, No                                                                 |
| X35 | Medication in mental disorders | 1, Yes; 0, No                                                                 |

|     |                                                                 |               |
|-----|-----------------------------------------------------------------|---------------|
| X36 | Non-steroidal anti-inflammatory drugs                           | 1, Yes; 0, No |
| X37 | Antiallergic agent                                              | 1, Yes; 0, No |
| X38 | Genito-urinary system medicines                                 | 1, Yes; 0, No |
| X39 | Medicines for hematopathy                                       | 1, Yes; 0, No |
| X40 | Endocrine agents or hormone drugs                               | 1, Yes; 0, No |
| X41 | Antineoplastic drugs                                            | 1, Yes; 0, No |
| X42 | Amino acids, vitamins, minerals or other nutrition preparations | 1, Yes; 0, No |
| X43 | Regulating water, electrolyte or acid-base balance drugs        | 1, Yes; 0, No |
| X44 | Adjuvant agents to anesthesia or anesthetics                    | 1, Yes; 0, No |
| X45 | Diagnostic agents                                               | 1, Yes; 0, No |
| X46 | Biological agents                                               | 1, Yes; 0, No |
| X47 | Obstetrical-gynecological drugs                                 | 1, Yes; 0, No |
| X48 | Stomatological preparations                                     | 1, Yes; 0, No |
| X49 | Ophthalmic medication                                           | 1, Yes; 0, No |
| X50 | Ear-nose-throat medication                                      | 1, Yes; 0, No |
| X51 | Dermatology medication                                          | 1, Yes; 0, No |
| X52 | Other traditional Chinese medicines                             | 1, Yes; 0, No |

|     |                             |                                                                                                                                                                                                                                                                                                                                                                                                                                                                                                                                             |
|-----|-----------------------------|---------------------------------------------------------------------------------------------------------------------------------------------------------------------------------------------------------------------------------------------------------------------------------------------------------------------------------------------------------------------------------------------------------------------------------------------------------------------------------------------------------------------------------------------|
|     | or Chinese patent medicines |                                                                                                                                                                                                                                                                                                                                                                                                                                                                                                                                             |
| X53 | Urea                        | 1, Below the normal range; 2, Within the normal range; 3, Above the normal range                                                                                                                                                                                                                                                                                                                                                                                                                                                            |
| X54 | Serum creatinine            | 1, Below the normal range; 2, Within the normal range; 3, Above the normal range                                                                                                                                                                                                                                                                                                                                                                                                                                                            |
| X55 | Renal function              | 1, Glomerular filtration rate $\geq 90$ ml/(min $\cdot$ 1.73m <sup>2</sup> ); 2, 60ml/(min $\cdot$ 1.73m <sup>2</sup> ) $\leq$ Glomerular filtration rate $\leq 89$ ml/(min $\cdot$ 1.73m <sup>2</sup> ); 3, 30ml/(min $\cdot$ 1.73m <sup>2</sup> ) $\leq$ Glomerular filtration rate $\leq 59$ ml/(min $\cdot$ 1.73m <sup>2</sup> ); 4, 15ml/(min $\cdot$ 1.73m <sup>2</sup> ) $\leq$ Glomerular filtration rate $\leq 29$ ml/(min $\cdot$ 1.73m <sup>2</sup> ); 5, Glomerular filtration rate $< 15$ ml/(min $\cdot$ 1.73m <sup>2</sup> ) |
| X56 | Blood glucose               | 1, Below the normal range; 2, Within the normal range; 3, Above the normal range                                                                                                                                                                                                                                                                                                                                                                                                                                                            |
| X57 | Serum potassium             | 1, Below the normal range; 2, Within the normal range; 3, Above the normal range                                                                                                                                                                                                                                                                                                                                                                                                                                                            |
| X58 | Serum sodium                | 1, Below the normal range; 2, Within the normal range; 3, Above the normal range                                                                                                                                                                                                                                                                                                                                                                                                                                                            |
| X59 | Total cholesterol           | 1, Below the normal range; 2, Within the normal range; 3, Above the normal range                                                                                                                                                                                                                                                                                                                                                                                                                                                            |
| X60 | Triglyceride                | 1, Below the normal range; 2, Within the normal range; 3, Above the normal range                                                                                                                                                                                                                                                                                                                                                                                                                                                            |
| X61 | High-density lipoprotein    | 1, Below the normal range; 2, Within the normal range; 3, Above the normal range                                                                                                                                                                                                                                                                                                                                                                                                                                                            |
| X62 | Low-density lipoprotein     | 1, Below the normal range; 2, Within the normal range; 3, Above the normal range                                                                                                                                                                                                                                                                                                                                                                                                                                                            |
| X63 | Albumin                     | 1, Below the normal range; 2, Within the normal range; 3, Above the normal range                                                                                                                                                                                                                                                                                                                                                                                                                                                            |
| X64 | Hypoproteinemia             | 1, Yes; 0, No                                                                                                                                                                                                                                                                                                                                                                                                                                                                                                                               |
| X65 | Globulin                    | 1, Below the normal range; 2, Within the normal range; 3, Above the normal range                                                                                                                                                                                                                                                                                                                                                                                                                                                            |
| X66 | Albumin/globulin (A/G)      | 1, Below the normal range; 2, Within the normal range; 3, Above the normal range                                                                                                                                                                                                                                                                                                                                                                                                                                                            |
| X67 | Aspartate aminotransferase  | 1, Below the normal range; 2, Within the normal range; 3, Above the normal range                                                                                                                                                                                                                                                                                                                                                                                                                                                            |
| X68 | Alanine aminotransferase    | 1, Below the normal range; 2, Within the normal range; 3, Above the normal range                                                                                                                                                                                                                                                                                                                                                                                                                                                            |

|     |                                       |                                                                                                                                                    |
|-----|---------------------------------------|----------------------------------------------------------------------------------------------------------------------------------------------------|
| X69 | Liver function                        | 1, Less than 3 times upper limit of normal range of liver function tests (ULN of LFTs); 2, 3~5 times ULN of LFTs; 3, More than 5 times ULN of LFTs |
| X70 | Total bilirubin                       | 1, Below the normal range; 2, Within the normal range; 3, Above the normal range                                                                   |
| X71 | Lactic dehydrogenase                  | 1, Below the normal range; 2, Within the normal range; 3, Above the normal range                                                                   |
| X72 | Creatine kinase                       | 1, Below the normal range; 2, Within the normal range; 3, Above the normal range                                                                   |
| X73 | White blood cell                      | 1, Below the normal range; 2, Within the normal range; 3, Above the normal range                                                                   |
| X74 | Neutrophil granulocyte                | 1, Below the normal range; 2, Within the normal range; 3, Above the normal range                                                                   |
| X75 | Lymphocyte percentage                 | 1, Below the normal range; 2, Within the normal range; 3, Above the normal range                                                                   |
| X76 | Monocyte percentage                   | 1, Below the normal range; 2, Within the normal range; 3, Above the normal range                                                                   |
| X77 | Eosinophils                           | 1, Below the normal range; 2, Within the normal range; 3, Above the normal range                                                                   |
| X78 | Red blood cell                        | 1, Below the normal range; 2, Within the normal range; 3, Above the normal range                                                                   |
| X79 | Hemoglobin                            | 1, Below the normal range; 2, Within the normal range; 3, Above the normal range                                                                   |
| X80 | Platelet count                        | 1, Below the normal range; 2, Within the normal range; 3, Above the normal range                                                                   |
| X81 | Hypersensitive C-reactive protein     | 0, Within the normal range; 1, Above the normal range                                                                                              |
| X82 | Pre-treatment indicators of carcinoma | 0, Within the normal range; 1, Above the normal range                                                                                              |
| X83 | Pre-treatment serum levels            | 0, Within the normal range; 1, Above the normal range                                                                                              |

**Table 3** Results of different variable preprocessing methods

| Method          | Included variables                                                                                                                                                                                                                                                                                                  |
|-----------------|---------------------------------------------------------------------------------------------------------------------------------------------------------------------------------------------------------------------------------------------------------------------------------------------------------------------|
| Column deletion | X1, X2, X3, X5, X7, X8, X12, X13, X14, X15, X16, X17, X18, X19, X20, X21, X22, X28, X29, X30, X31, X32, X33, X34, X35, X36, X39, X40, X41, X42, X43, X44, X45, X46, X51, X52, X54, X55, X56, X57, X58, X59, X60, X61, X62, X63, X65, X66, X67, X68, X71, X72, X73, X74, X75, X76, X77, X78, X79, X80, X81, X82, X83 |
| Lasso           | X1, X2, X18, X29, X30, X31, X33, X51, X52, X54, X55, X65, X66, X68, X78                                                                                                                                                                                                                                             |
| Boruta          | X1, X2, X5, X12, X13, X16, X17, X18, X20, X29, X30, X31, X33, X39, X40, X51, X52, X54, X55, X63, X66, X67, X68, X74, X75, X77, X78, X79                                                                                                                                                                             |

Variable names were shown in Supplementary Table 2.

**Table 4** The effect of different data processing methods and machine learning algorithms on model prediction performance (Ten-fold cross-validation)

|                      | AUC                       |             | Accuracy                  |             | Precision                 |             | Recall rate               |             | F1 value                  |             |
|----------------------|---------------------------|-------------|---------------------------|-------------|---------------------------|-------------|---------------------------|-------------|---------------------------|-------------|
|                      | Mean±SD                   | 95%CI       | Mean±SD                   | 95%CI       | Mean±SD                   | 95%CI       | Mean±SD                   | 95%CI       | Mean±SD                   | 95%CI       |
| Data filling         |                           |             |                           |             |                           |             |                           |             |                           |             |
| No filling           | 0.868±0.099               | 0.864-0.872 | 0.820±0.093               | 0.816-0.823 | 0.772±0.190               | 0.765-0.779 | 0.720±0.254               | 0.710-0.730 | 0.729±0.217               | 0.721-0.737 |
| Simple filling       | 0.881±0.097               | 0.877-0.885 | 0.828±0.100               | 0.824-0.832 | 0.793±0.165               | 0.787-0.799 | 0.746±0.243               | 0.737-0.756 | 0.751±0.197               | 0.744-0.759 |
| RF filling           | 0.885±0.095               | 0.881-0.888 | 0.831±0.095               | 0.827-0.835 | <b>0.802±0.157</b>        | 0.796-0.808 | 0.749±0.237               | 0.740-0.759 | <b>0.757±0.189</b>        | 0.750-0.764 |
| RF improve filling   | <b>0.887±0.094</b>        | 0.883-0.890 | <b>0.832±0.096</b>        | 0.828-0.835 | 0.799±0.158               | 0.793-0.806 | <b>0.751±0.240</b>        | 0.742-0.760 | 0.757±0.191               | 0.749-0.764 |
| <i>p</i> value       | <b><i>p</i>&lt;0.0001</b> |             | <b><i>p</i>&lt;0.0001</b> |             | <b><i>p</i>&lt;0.0001</b> |             | <b><i>p</i>&lt;0.0001</b> |             | <b><i>p</i>&lt;0.0001</b> |             |
| Data sampling        |                           |             |                           |             |                           |             |                           |             |                           |             |
| No sampling          | 0.824±0.088               | 0.820-0.828 | 0.832±0.050               | 0.830-0.835 | 0.641±0.271               | 0.629-0.653 | 0.399±0.197               | 0.391-0.408 | 0.464±0.193               | 0.455-0.472 |
| Random over sampler  | <b>0.923±0.063</b>        | 0.920-0.925 | 0.858±0.085               | 0.854-0.861 | <b>0.849±0.079</b>        | 0.845-0.852 | 0.872±0.118               | 0.867-0.877 | 0.857±0.089               | 0.854-0.861 |
| Random under sampler | 0.815±0.107               | 0.810-0.819 | 0.732±0.104               | 0.728-0.737 | 0.783±0.145               | 0.776-0.789 | 0.678±0.188               | 0.670-0.686 | 0.707±0.132               | 0.701-0.713 |
| SMOTE over sampler   | 0.920±0.072               | 0.917-0.923 | 0.857±0.081               | 0.853-0.860 | 0.844±0.071               | 0.841-0.848 | 0.875±0.125               | 0.869-0.880 | 0.856±0.089               | 0.852-0.860 |
| Borderline SMOTE     | 0.919±0.077               | 0.916-0.923 | <b>0.859±0.085</b>        | 0.855-0.862 | 0.841±0.074               | 0.837-0.844 | <b>0.885±0.130</b>        | 0.879-0.890 | <b>0.859±0.093</b>        | 0.855-0.863 |
| <i>p</i> value       | <b><i>p</i>&lt;0.0001</b> |             | <b><i>p</i>&lt;0.0001</b> |             | <b><i>p</i>&lt;0.0001</b> |             | <b><i>p</i>&lt;0.0001</b> |             | <b><i>p</i>&lt;0.0001</b> |             |
| Variable selection   |                           |             |                           |             |                           |             |                           |             |                           |             |

|                             |                    |             |                           |             |                           |             |                           |             |                           |             |
|-----------------------------|--------------------|-------------|---------------------------|-------------|---------------------------|-------------|---------------------------|-------------|---------------------------|-------------|
| No selection                | 0.870±0.105        | 0.867-0.874 | 0.820±0.104               | 0.817-0.824 | 0.780±0.178               | 0.774-0.786 | 0.733±0.254               | 0.725-0.742 | 0.737±0.208               | 0.730-0.744 |
| Lasso selection             | <b>0.889±0.089</b> | 0.886-0.892 | <b>0.835±0.090</b>        | 0.832-0.838 | <b>0.801±0.165</b>        | 0.796-0.807 | <b>0.751±0.240</b>        | 0.743-0.759 | <b>0.758±0.196</b>        | 0.752-0.765 |
| Boruta selection            | 0.881±0.094        | 0.878-0.884 | 0.827±0.093               | 0.824-0.830 | 0.794±0.162               | 0.788-0.799 | 0.741±0.236               | 0.733-0.749 | 0.750±0.191               | 0.744-0.757 |
| <i>p</i> value              |                    |             | <b><i>p</i>&lt;0.0001</b> |             | <b><i>p</i>&lt;0.0001</b> |             | <b><i>p</i>&lt;0.0001</b> |             | <b><i>p</i>&lt;0.0001</b> |             |
| machine learning algorithms |                    |             |                           |             |                           |             |                           |             |                           |             |
| AdaBoost                    | 0.871±0.092        | 0.864-0.879 | 0.813±0.093               | 0.806-0.820 | 0.784±0.136               | 0.773-0.795 | 0.731±0.202               | 0.715-0.747 | 0.745±0.160               | 0.733-0.758 |
| Bagging                     | 0.907±0.102        | 0.898-0.915 | 0.854±0.101               | 0.846-0.863 | 0.805±0.158               | 0.793-0.818 | 0.791±0.245               | 0.771-0.810 | 0.785±0.196               | 0.769-0.801 |
| Bernoulli NB                | 0.866±0.082        | 0.860-0.873 | 0.802±0.085               | 0.795-0.809 | 0.771±0.144               | 0.759-0.783 | 0.719±0.178               | 0.705-0.733 | 0.736±0.148               | 0.724-0.748 |
| DT                          | 0.815±0.110        | 0.806-0.824 | 0.805±0.089               | 0.797-0.812 | 0.773±0.158               | 0.760-0.786 | 0.715±0.237               | 0.696-0.734 | 0.724±0.184               | 0.709-0.739 |
| ET                          | 0.829±0.110        | 0.821-0.838 | 0.809±0.092               | 0.801-0.816 | 0.767±0.164               | 0.754-0.780 | 0.714±0.255               | 0.694-0.735 | 0.720±0.207               | 0.704-0.737 |
| Gaussian NB                 | 0.845±0.089        | 0.838-0.852 | 0.786±0.085               | 0.779-0.793 | 0.734±0.155               | 0.722-0.747 | 0.743±0.164               | 0.730-0.756 | 0.730±0.143               | 0.719-0.742 |
| Gradient Boosting           | 0.891±0.102        | 0.883-0.899 | 0.841±0.099               | 0.833-0.849 | 0.822±0.149               | 0.810-0.834 | 0.746±0.252               | 0.725-0.766 | 0.762±0.194               | 0.747-0.778 |
| KNN                         | 0.896±0.084        | 0.890-0.903 | 0.830±0.098               | 0.822-0.838 | 0.747±0.296               | 0.724-0.771 | 0.687±0.381               | 0.656-0.717 | 0.674±0.326               | 0.648-0.700 |
| LDA                         | 0.897±0.073        | 0.891-0.903 | 0.835±0.081               | 0.829-0.842 | 0.805±0.117               | 0.796-0.815 | 0.768±0.191               | 0.753-0.783 | 0.777±0.144               | 0.765-0.788 |
| LR                          | 0.893±0.076        | 0.886-0.899 | 0.834±0.082               | 0.827-0.840 | 0.815±0.119               | 0.805-0.824 | 0.754±0.216               | 0.737-0.772 | 0.767±0.157               | 0.755-0.780 |
| Multinomial NB              | 0.839±0.071        | 0.834-0.845 | 0.773±0.078               | 0.766-0.779 | 0.753±0.161               | 0.740-0.766 | 0.653±0.235               | 0.634-0.672 | 0.676±0.190               | 0.660-0.691 |
| Passive Aggressive          | 0.836±0.098        | 0.828-0.844 | 0.780±0.091               | 0.772-0.787 | 0.723±0.161               | 0.711-0.736 | 0.720±0.205               | 0.703-0.736 | 0.712±0.172               | 0.698-0.725 |

|                |                    |                           |                           |             |                           |             |                           |             |                           |             |
|----------------|--------------------|---------------------------|---------------------------|-------------|---------------------------|-------------|---------------------------|-------------|---------------------------|-------------|
| QDA            | 0.915±0.081        | 0.909-0.922               | 0.860±0.089               | 0.853-0.868 | 0.827±0.152               | 0.814-0.839 | 0.798±0.184               | 0.783-0.812 | 0.805±0.156               | 0.792-0.817 |
| RF             | 0.919±0.097        | 0.911-0.926               | 0.871±0.100               | 0.863-0.879 | 0.843±0.154               | 0.831-0.856 | 0.775±0.268               | 0.753-0.796 | 0.788±0.214               | 0.771-0.805 |
| SGD            | 0.895±0.075        | 0.889-0.901               | 0.832±0.082               | 0.825-0.839 | 0.803±0.197               | 0.787-0.819 | 0.710±0.287               | 0.687-0.733 | 0.726±0.238               | 0.707-0.745 |
| SVM            | <b>0.926±0.086</b> | 0.919-0.933               | <b>0.875±0.096</b>        | 0.867-0.883 | <b>0.858±0.144</b>        | 0.847-0.870 | 0.776±0.271               | 0.754-0.797 | 0.791±0.217               | 0.773-0.808 |
| XGBoost        | 0.922±0.092        | 0.914-0.929               | 0.869±0.100               | 0.861-0.877 | 0.825±0.153               | 0.812-0.837 | <b>0.810±0.229</b>        | 0.792-0.828 | <b>0.808±0.185</b>        | 0.793-0.822 |
| <i>p</i> value |                    | <b><i>p</i>&lt;0.0001</b> | <b><i>p</i>&lt;0.0001</b> |             | <b><i>p</i>&lt;0.0001</b> |             | <b><i>p</i>&lt;0.0001</b> |             | <b><i>p</i>&lt;0.0001</b> |             |

AUC, Area under curve; RF, Random Forest; SMOTE, Synthetic minority oversampling technique; Bernoulli NB, Bernoulli Naïve Bayes; DT, Decision Tree; ET, Extra Tree; Gaussian NB, Gaussian Naïve Bayes; KNN, K-Nearest Neighbor; LDA, Latent Dirichlet Allocation; LR, Logistic Regression; Multinomial NB, Multinomial Naïve Bayes; QDA, Quadratic Discriminant Analysis; SGD, Stochastic Gradient Descent; SVM, support vector machine. XGBoost, eXtreme Gradient Boosting
